# Supplementary material for: SARS-CoV-2-specific peripheral T follicular helper cells correlate with neutralizing antibodies and increase during convalescence
Source: bioRxiv or medRxiv preprint supplement (doi:10.1101/2020.10.07.20208488), 2020-10-12
Supplement: Supplementary file [file media-1.pdf]

**Supplemental Table 1: Flow cytometry panels**

| AIM       |              |           |                | ICS          |              |        |                |
|-----------|--------------|-----------|----------------|--------------|--------------|--------|----------------|
| Marker    | Fluorochrome | Clone     | Company        | Marker       | Fluorochrome | Clone  | Company        |
| Viability | UV           |           | Invitrogen     | Viability    | UV           |        | Invitrogen     |
| CCR7      | PercpCy5.5   | 150503    | BD Pharminogen | CD107a       | FITC         | H4A3   | BD Pharminogen |
| CD4       | Pe610        | RPA-T4    | Invitrogen     | CD3          | A780         | UCHT1  | Invitrogen     |
| CD3       | A780         | UCHT1     | Invitrogen     | CD4          | BV785        | SK3    | Biolegend      |
| CD8       | FITC         | SK1       | BD Biosciences | CD8          | V500         | RPA-T8 | BD Horizon     |
| CD14      | A700         | M5E2      | BD Pharminogen | CD14         | PercpCy5.5   | M5E2   | BD Pharminogen |
| CD19      | A700         | HIb19     | BD Pharminogen | CD19         | PercpCy5.5   | SJ25C1 | BD Biosciences |
| Ox40      | PeCy7        | Ber-ACT35 | Biolegend      | IFN $\gamma$ | A700         | B27    | BD Pharminogen |
| PDL1      | PE           | MIH1      | BD Pharminogen | TNF $\alpha$ | PeCy7        | MAb11  | BD Pharminogen |
| CXCR5     | BV421        | RF8B2     | BD Horizon     | CD154        | APC          | TRAP1  | BD Pharminogen |
| PD1       | BV785        | EH12.2H7  | Biolegend      |              |              |        |                |
| CD45RA    | BV510        | HI100     | BD Horizon     |              |              |        |                |
| CD137     | BV650        | 4B4-1     | BD Horizon     |              |              |        |                |
| CD69      | BUV737       | RN50      | BD Horizon     |              |              |        |                |
