# Supplementary material for: SARS-CoV-2-specific peripheral T follicular helper cells correlate with neutralizing antibodies and increase during convalescence
Source: bioRxiv or medRxiv preprint supplement (doi:10.1101/2020.10.07.20208488), 2020-10-12

**Supplemental Figure 1: Flow cytometry gating strategies. (A)**

Gating strategy for CD4 T cell and pTfh by activation-induced marker (AIM). **(B)** Gating strategy for CD4 T cell staining by intracellular cytokine staining.

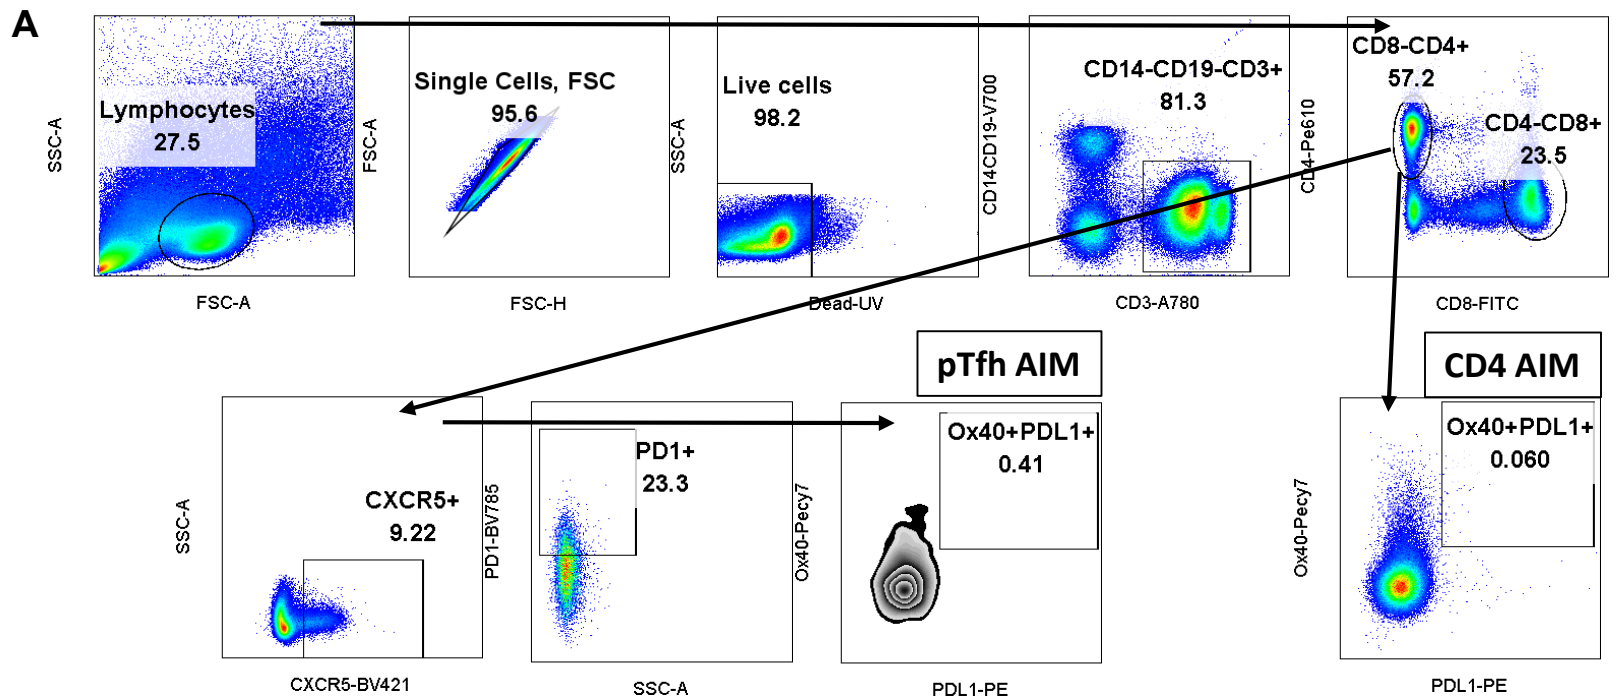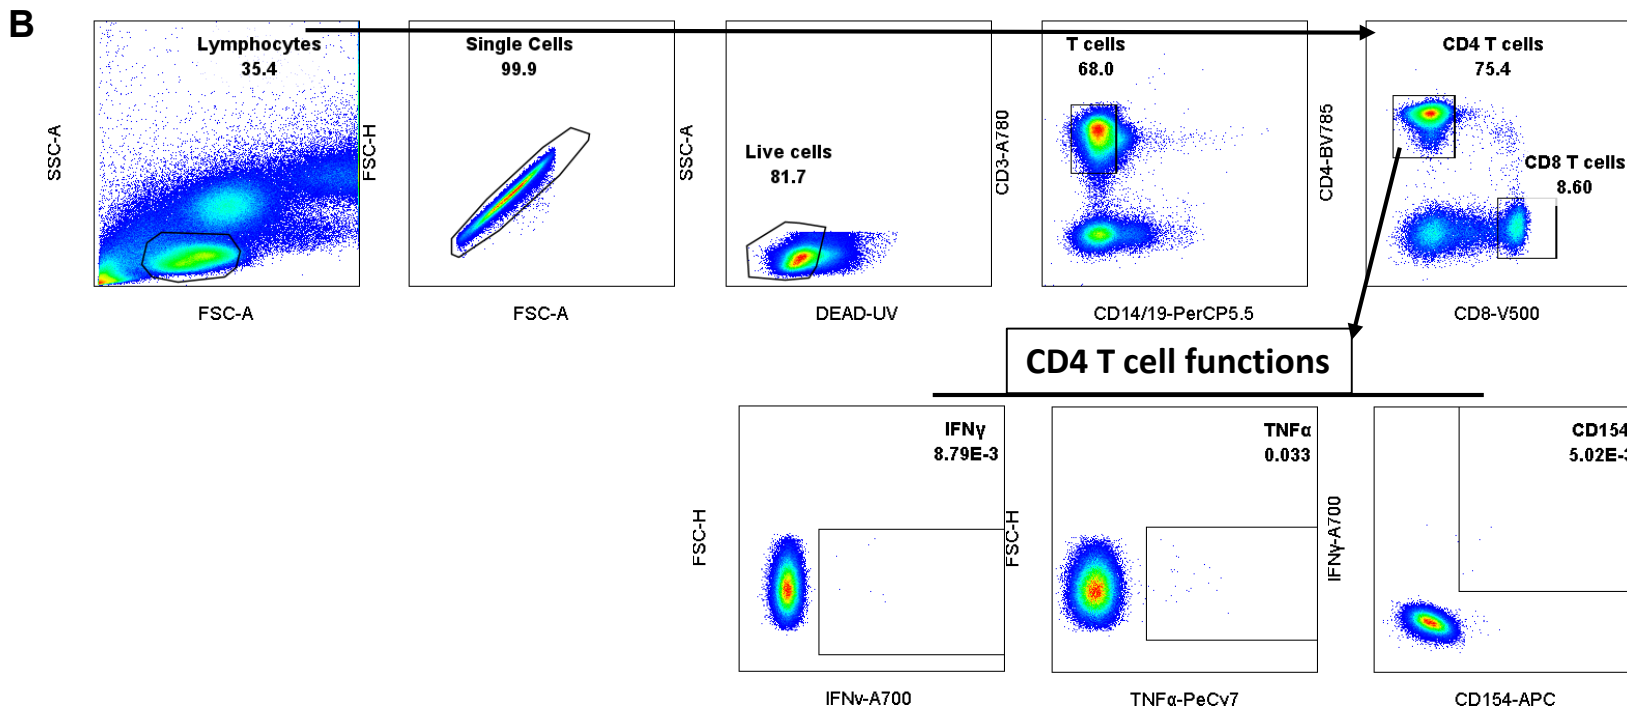

Supplement: Supplementary file [file media-2.pdf]
