# Supplementary material for: SARS-CoV-2-specific peripheral T follicular helper cells correlate with neutralizing antibodies and increase during convalescence
Source: bioRxiv or medRxiv preprint supplement (doi:10.1101/2020.10.07.20208488), 2020-10-12

**Supplemental Figure 4: Summary of all responses detected across two convalescent visits. (A-C)** Response summary for CD4 T cells by activation-induced marker staining, for pTfh by activation-induced marker staining, and for CD4 T cells by intracellular cytokine staining, respectively. Blue-filled cells indicate a positive response; white cells indicate a negative response. **(D)** Responder frequency by AIM across the two visit (positive at either visit) overall and to each protein. **(E)** Responder frequency by ICS across the two visits (positive at either visit).

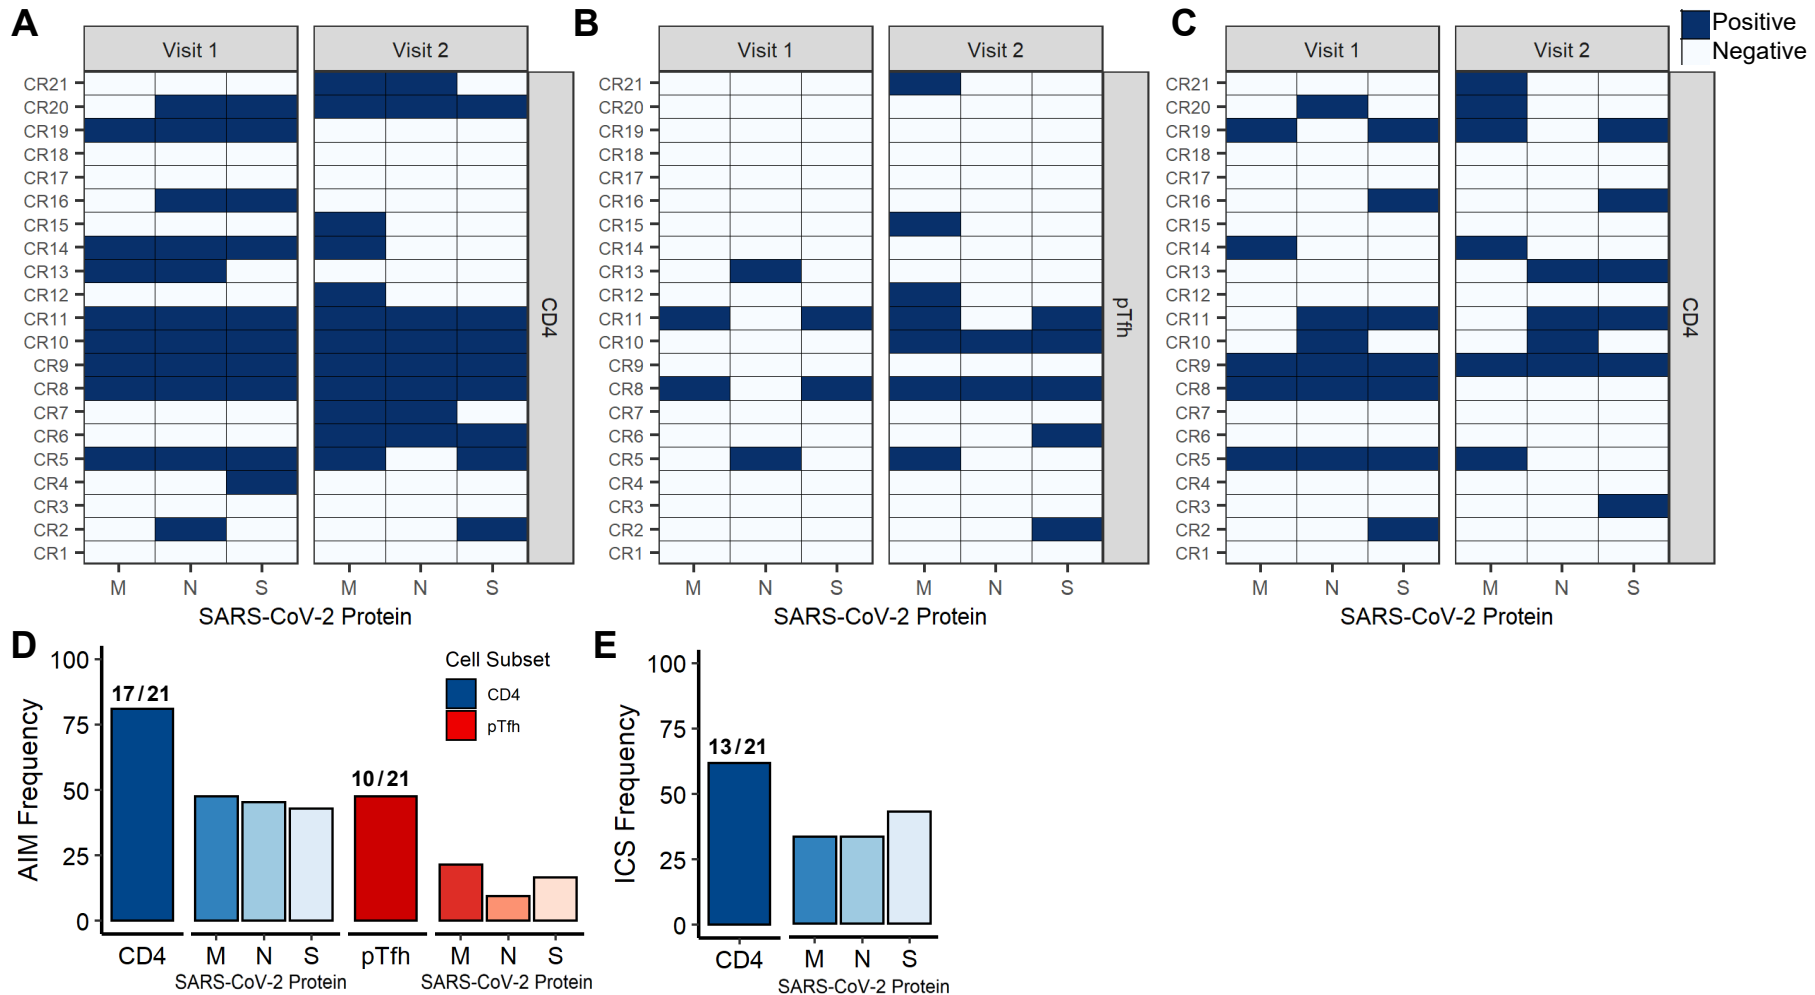

Supplement: Supplementary file [file media-5.pdf]
